# Supplementary material for: Water vapour and heat combine to elicit biting and biting persistence in tsetse
Source: PubMed Central journal article supplement (PMC3765185; doi:10.1186/1756-3305-6-240), 2013-08-19

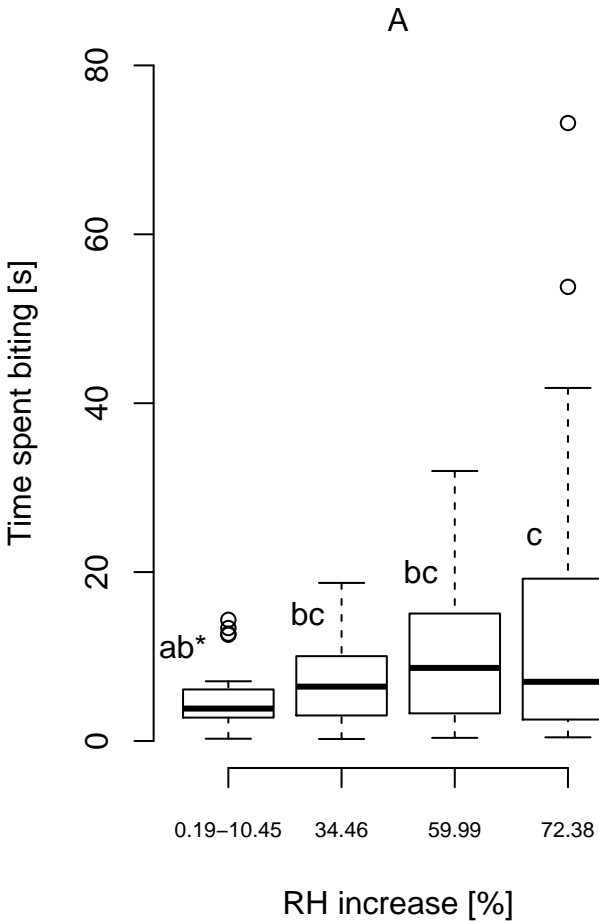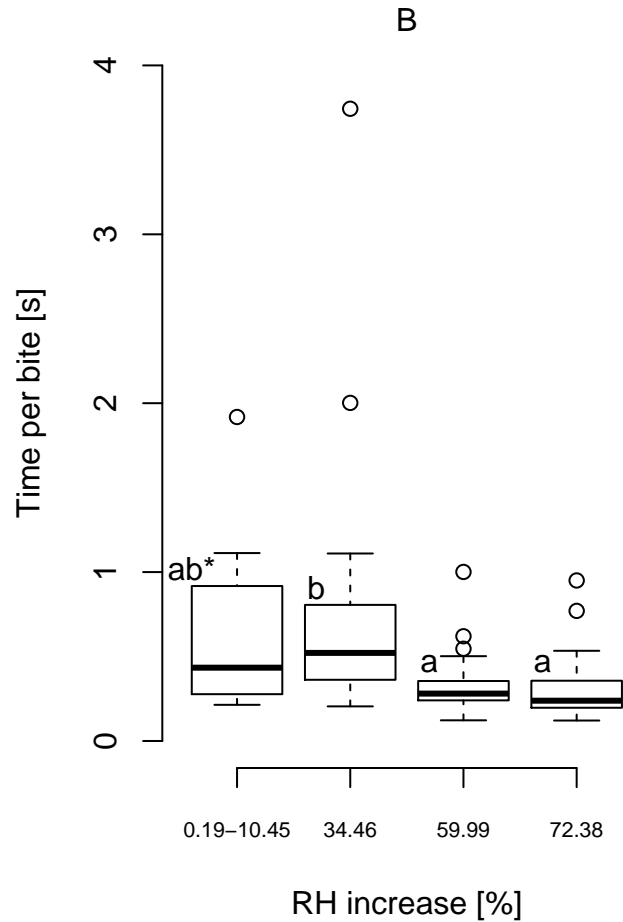

Supplement: 1756-3305-6-240-S2.pdf [file 1756-3305-6-240-S2.pdf]
