# Supplementary material for: Water vapour and heat combine to elicit biting and biting persistence in tsetse
Source: PubMed Central journal article supplement (PMC3765185; doi:10.1186/1756-3305-6-240), 2013-08-19

$\Delta RH = 0.06$

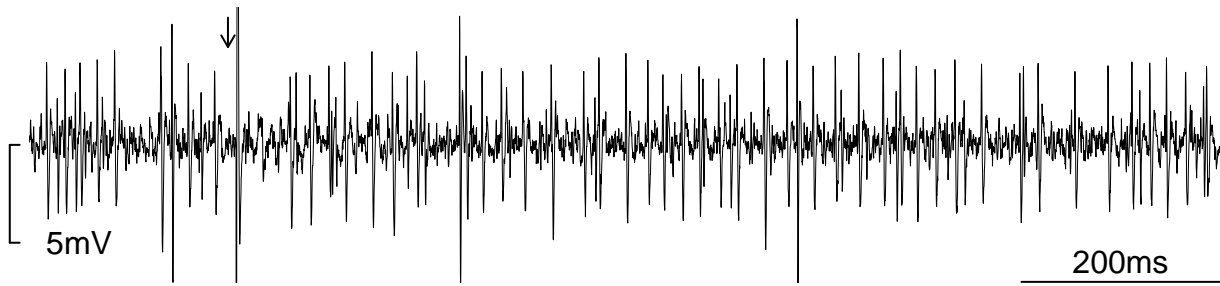

$\Delta RH = -27.35$

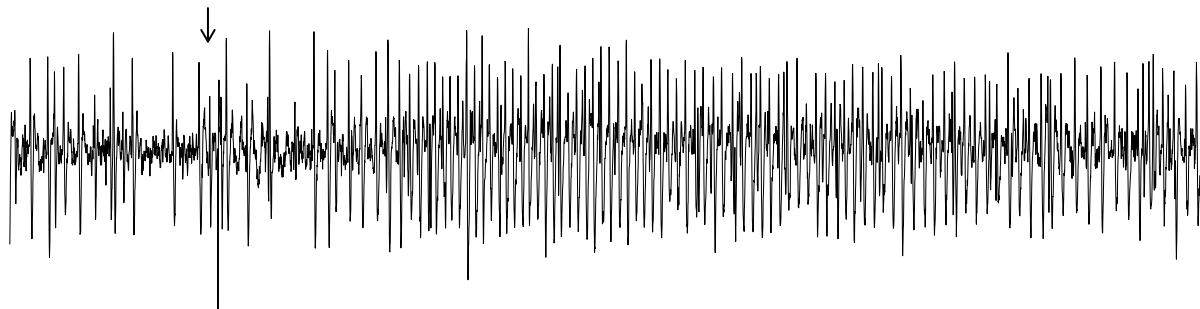

$\Delta RH = -41.44$

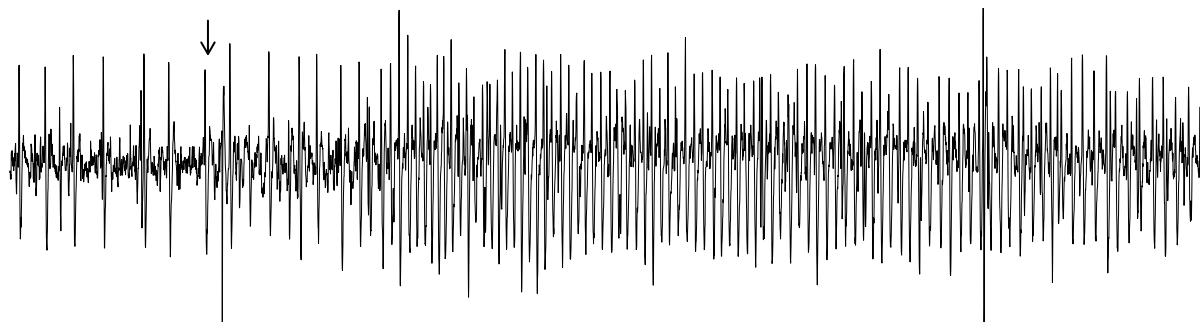

Supplement: 1756-3305-6-240-S3.pdf [file 1756-3305-6-240-S3.pdf]
